## Changes in expression levels of *ERCC1*, *DPYD*, and *VEGFA* mRNA after first-line chemotherapy of metastatic colorectal cancer: results of a multicenter study

Hideo Baba<sup>1,\*</sup>, Yoshifumi Baba<sup>1,\*</sup>, Shinji Uemoto<sup>2</sup>, Kazuhiro Yoshida<sup>3</sup>, Akio Saiura<sup>4</sup>, Masayuki Watanabe<sup>4</sup>, Yoshihiko Maehara<sup>5</sup>, Eiji Oki<sup>5</sup>, Yasuharu Ikeda<sup>6</sup>, Hiroyuki Matsuda<sup>7</sup>, Masakazu Yamamoto<sup>8</sup>, Mitsuo Shimada<sup>9</sup>, Akinobu Taketomi<sup>10</sup>, Michiaki Unno<sup>11</sup>, Kenichi Sugihara<sup>12</sup>, Yutaka Ogata<sup>13</sup>, Susumu Eguchi<sup>14</sup>, Seigo Kitano<sup>15</sup>, Kazuo Shirouzu<sup>16</sup>, Yasumitsu Saiki<sup>17</sup>, Hiroshi Takamori<sup>18</sup>, Masaki Mori<sup>19</sup>, Toshihiko Hirata<sup>20</sup>, Go Wakabayashi<sup>21</sup> and Norihiro Kokudo<sup>22</sup>

<sup>1</sup> Department of Gastroenterological Surgery, Graduate School of Medical Science, Kumamoto University, Kumamoto, Japan

<sup>2</sup> Department of Surgery, Graduate School of Medicine, Kyoto University, Kyoto, Japan

<sup>3</sup> Department of Surgical Oncology, Gifu Graduate School of Medicine, Gifu, Japan

<sup>4</sup> Department of Gastroenterological Surgery, Cancer Institute Hospital, Japanese Foundation for Cancer Research, Tokyo, Japan

<sup>5</sup> Department of Surgery and Science, Graduate School of Medical Sciences, Kyushu University, Fukuoka, Japan

<sup>6</sup> Department of Gastroenterological Surgery, National Hospital Organization Kyushu Cancer Center, Fukuoka, Japan

<sup>7</sup> Department of Surgery, Hiroshima Red Cross Hospital and Atomic-bomb Survivors Hospital, Hiroshima, Japan

<sup>8</sup> Department of Surgery, Tokyo Women's Medical University, Tokyo, Japan

<sup>9</sup> Department of Surgery, Institute of Health Biosciences, The University of Tokushima Graduate School, Tokushima, Japan

<sup>10</sup> Department of Gastroenterological Surgery I, Hokkaido University Graduate School of Medicine, Sapporo, Japan

<sup>11</sup> Department of Surgery, Tohoku University Graduate School of Medicine, Sendai, Japan

<sup>12</sup> Department of Surgical Oncology, Tokyo Medical and Dental University, Tokyo, Japan

<sup>13</sup> Department of Surgery, Kurume University Medical Center, Kurume, Japan

<sup>14</sup> Department of Surgery, Nagasaki University Graduate School of Biomedical Sciences, Nagasaki, Japan

<sup>15</sup> Department of Gastroenterological and Pediatric Surgery, Oita University Faculty of Medicine, Oita, Japan

<sup>16</sup> Department of Surgery, Kurume University School of Medicine, Kurume, Japan

<sup>17</sup> Coloproctology Center, Takano Hospital, Kumamoto, Japan

<sup>18</sup> Department of Surgery, Saiseikai Kumamoto Hospital, Kumamoto, Japan

<sup>19</sup> Department of Gastroenterological Surgery, Graduate School of Medicine, Osaka University, Osaka, Japan

<sup>20</sup> Department of Surgery, Japanese Red Cross Kumamoto Hospital, Kumamoto, Japan

<sup>21</sup> Department of Surgery, Iwate Medical University, School of Medicine, Morioka, Japan

<sup>22</sup> Hepato-Biliary-Pancreatic Surgery Division, Department of Surgery, Graduate School of Medicine, The University of Tokyo, Tokyo, Japan

\* These authors have contributed equally to this work

**Correspondence to:** Hideo Baba, **email:** hdebaba@kumamoto-u.ac.jp

**Keywords:** *ERCC1*, *DPYD*, *VEGFA*, colorectal cancer, bevacizumab

**Received:** July 18, 2015

**Accepted:** August 12, 2015

**Published:** August 19, 2015

This is an open-access article distributed under the terms of the Creative Commons Attribution License, which permits unrestricted use, distribution, and reproduction in any medium, provided the original author and source are credited.

### ABSTRACT

**Our previous study showed that administering oxaliplatin as first-line chemotherapy increased *ERCC1* and *DPD* levels in liver colorectal cancers (CRCs) metastases. Second, whether the anti-VEGF monoclonal antibody bevacizumab alters tumoral *VEGFA* levels is unknown. We conducted this multicenter observational study to validate our previous findings on *ERCC1* and *DPD*, and clarify the response of**

**VEGFA expression to bevacizumab administration. 346 CRC patients with liver metastases were enrolled at 22 Japanese institutes. Resected liver metastases were available for 175 patients previously treated with oxaliplatin-based chemotherapy (chemotherapy group) and 171 receiving no previous chemotherapy (non-chemotherapy group). *ERCC1*, *DPYD*, and *VEGFA* mRNA levels were measured by real-time RT-PCR. *ERCC1* mRNA expression was significantly higher in the chemotherapy group than in the non-chemotherapy group ( $P = 0.033$ ), and were significantly correlated (Spearman's correlation coefficient = 0.42;  $P < 0.0001$ ). *VEGFA* expression level was higher in patients receiving bevacizumab ( $n = 51$ ) than in those who did not ( $n = 251$ ) ( $P = 0.007$ ). This study confirmed that first-line oxaliplatin-based chemotherapy increases *ERCC1* and *DPYD* expression levels, potentially enhancing chemosensitivity to subsequent therapy. We also found that bevacizumab induces *VEGFA* expression in tumor cells, suggesting a biologic rationale for extending bevacizumab treatment beyond first progression.**

## INTRODUCTION

Acquired resistance to chemotherapy and molecular-targeted therapy of human cancers is mediated by molecular alterations. Thus, understanding these alterations is increasingly important for predicting whether a patient will respond to chemotherapy and for counteracting resistance to anticancer agents.

The standard first-line chemotherapeutic regimen for metastatic colorectal cancer (CRC) is a combination of fluorouracil (5-FU) and folinic acid with oxaliplatin (i.e., FOLFOX) or irinotecan (i.e., FOLFIRI) with or without targeted agents.[1-3] Additionally, several second-line therapy regimes have been proposed for patients with recurring or progressive disease.[4-8] In a randomized phase II/III FIRIS study, IRIS (irinotecan/S-1) and FOLFIRI (5-FU-leucovorin/irinotecan) treatments yielded similar outcomes.[9, 10] Interestingly, this study reported a longer overall survival of patients in the IRIS group, previously undertaking oxaliplatin-containing chemotherapy, than patients in the FOLFIRI group. However, the reason for this remains poorly understood at the molecular level. To clarify the relevant molecular mechanisms, we previously conducted a single-center retrospective study of 45 CRC tissues. We found that administering oxaliplatin as first-line chemotherapy to CRC patients with liver metastases enhanced the patients' expression levels of two important genes: excision repair cross-complementing group 1 (*ERCC1*, a nucleotide excision repair pathway gene) and dihydropyrimidine dehydrogenase (*DPYD*, a pyrimidine catabolic pathway gene). We thus hypothesized that IRIS regimens combined with the DPD inhibitory fluoropyrimidine S-1 would be more effective against DPD-high tumors than the FOLFIRI regime.[11] However, our previous study was limited by a relatively small number of patients sourced from a single institute.

Bevacizumab is an anti-vascular endothelial growth factor (VEGF) monoclonal antibody commonly included in first-line therapy of metastatic CRC.[12, 13] Once disease has progressed beyond first line chemotherapy,

maintaining VEGF inhibition by bevacizumab has proven a clinically beneficial adjunct to standard second-line chemotherapy.[14-18] However, the biological rationale of continuing bevacizumab beyond first progression remains elusive. Given that circulating levels of short vascular endothelial growth factor A (VEGFA) isoforms and genetic variants of *VEGFA* or its receptors are promising biomarker candidates for bevacizumab,[19] we propose that investigating the *VEGFA* expression levels before and after first-line bevacizumab treatment may help to elucidate this rationale.

The present multicenter observational study of 346 CRC patients validates our previous findings that *ERCC1* and *DPYD* expression levels are altered by oxaliplatin-based chemotherapy. We also evaluate the response of *VEGFA* expression levels to bevacizumab administration.

## RESULTS

### Patient characteristics

Table 1 summarizes the characteristics of the study patients. The mean patient age at the time of liver dissection was 64.5 years (range 32–89 years). Oxaliplatin as first-line chemotherapy was administered to 166 patients under the following regimes: FOLFOX (92 patients), FOLFOX + Bevacizumab (52 patients), XELOX+ Bevacizumab (5 patients), XELOX (3 patients), and other regimens (14 patients).

Patients in the oxaliplatin-based chemotherapy group (chemotherapy group) were generally younger ( $P = 0.0014$ ) and had more liver metastases ( $P = 0.0001$ ) than patients in the non-chemotherapy group (Table 1). The mean number of liver metastases in the chemotherapy group was 3.51 (range 1–19), versus 2.14 in the non-chemotherapy group (range 1–14) ( $P < 0.0001$ ). There was no significant difference in sex, tumor location, or tumor differentiation between the two groups.

**Table 1: Patients characteristics**

| Clinical or pathological feature | Total N     | Prior oxaliplatin-based chemotherapy |             | P value |
|----------------------------------|-------------|--------------------------------------|-------------|---------|
|                                  |             | No                                   | Yes         |         |
| All cases                        | 336         | 170                                  | 166         |         |
| Mean age ± SD                    | 64.5 ± 10.7 | 66.3 ± 10.4                          | 62.7 ± 10.7 | 0.0019  |
| Sex                              |             |                                      |             | 0.23    |
| Male                             | 217 (65%)   | 115 (68%)                            | 102 (61%)   |         |
| Female                           | 119 (35%)   | 55 (32%)                             | 64 (39%)    |         |
| Number of liver metastasis       |             |                                      |             | 0.0002  |
| 1                                | 146 (43%)   | 91 (53%)                             | 55 (33%)    |         |
| 2-                               | 190 (57%)   | 79 (47%)                             | 111 (67%)   |         |
| Tumor location                   |             |                                      |             | 0.18    |
| Proximal colon                   | 70 (21%)    | 41 (24%)                             | 29 (18%)    |         |
| Distal colon                     | 135 (40%)   | 70 (41%)                             | 65 (39%)    |         |
| Rectum                           | 131 (39%)   | 59 (35%)                             | 72 (43%)    |         |
| Tumor differentiation            |             |                                      |             | 0.12    |
| Well                             | 95(28%)     | 56 (33%)                             | 39 (24%)    |         |
| Moderate                         | 219 (65%)   | 102 (60%)                            | 117 (70%)   |         |
| Others                           | 22 (6.6%)   | 12 (7.1%)                            | 10 (6.0%)   |         |
| Prior chemotherapy               |             |                                      |             |         |
| None                             |             | 170 (100%)                           |             |         |
| mFOLFOX6                         |             |                                      | 92 (55%)    |         |
| mFOLFOX+bevacizumab              |             |                                      | 52 (33%)    |         |
| XELOX+bevacizumab                |             |                                      | 5 (3.0%)    |         |
| XELOX                            |             |                                      | 3 (1.8%)    |         |
| Others                           |             |                                      | 14 (8.4%)   |         |

(%) indicates the proportion of cases with a specific clinical or pathological feature among each group (prior chemotherapy Yes or No)

### ***ERCC1* and *DPYD* mRNA expression levels with and without a prior oxaliplatin regimen**

As shown in Figure 2, *ERCC1* mRNA expression was significantly higher in the chemotherapy group (mean 7.11; median 7.12) than in the non-chemotherapy group (mean 6.94; median 6.88) ( $P = 0.033$ ). *DPYD* mRNA expression was similarly elevated in the chemotherapy group (mean 5.32; median 5.17) relative to the non-chemotherapy group (mean 5.04; median 5.17) ( $P = 0.023$ ). In the chemotherapy group, *ERCC1* or *DPYD* mRNA levels were unassociated with the number of chemotherapeutic cycles and with type of chemotherapeutic regimen (data not shown). However, expression levels of *ERCC1* and *DPYD* were significantly correlated (Spearman's correlation coefficient = 0.42;  $P < 0.0001$ ) (Figure 3), consistent with the findings of our previous single-center study.[11]

Given that chemotherapy history was significantly related to patient age and number of liver metastasis (Table 1), we correlated mRNA levels of *ERCC1* and

*DPYD* with both parameters. Age was not associated with *ERCC1* (Spearman's correlation coefficient = -0.02;  $P = 0.51$ ) or *DPYD* mRNA level (Spearman's correlation coefficient = -0.04;  $P = 0.71$ ). Similarly, no relationship was found between number of liver metastasis and *ERCC1* or *DPYD* mRNA levels ( $P = 0.69$  and  $P = 0.76$  for *ERCC1* and *DPYD*, respectively).

We also examined whether a prior oxaliplatin regimen altered the mRNA expression of DNA topoisomerase I (*TOP1*), a recognized predictive biomarker of irinotecan therapy. No significant difference in *TOP1* mRNA level was found between the groups receiving and not receiving oxaliplatin (Figure 2).

### **Immunohistochemical results**

The RT-PCR analysis revealed higher expression of *ERCC1* and *DPYD* mRNA in oxaliplatin-treated patients than in non-treated patients. The protein expression levels of these genes were determined by immunohistochemical examination. Tumor cells contained appreciable quantities

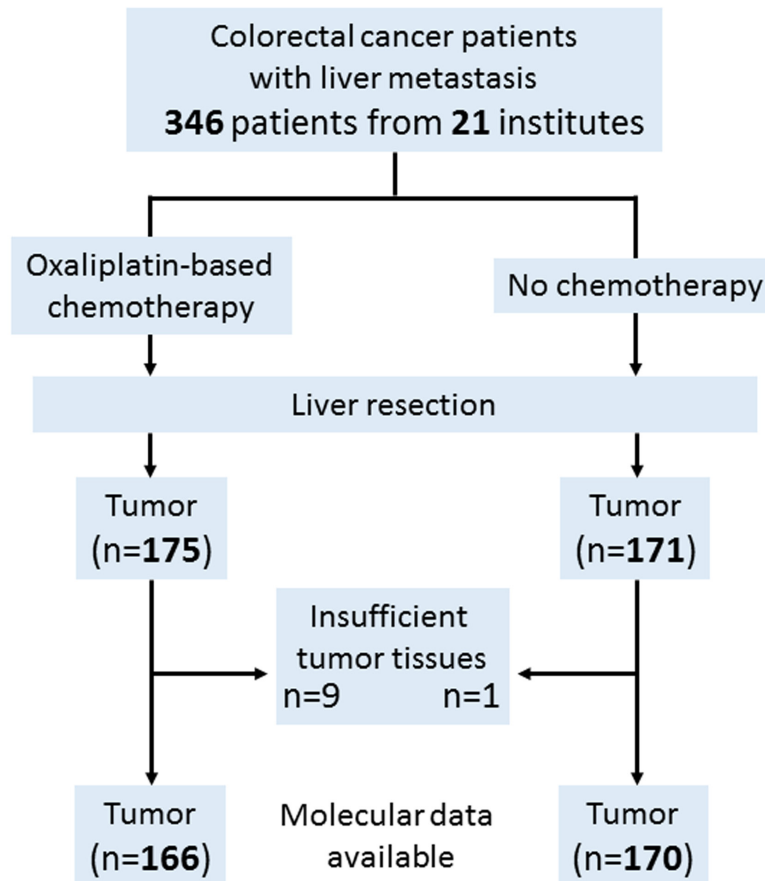

Figure 1: Flowchart of the present study.

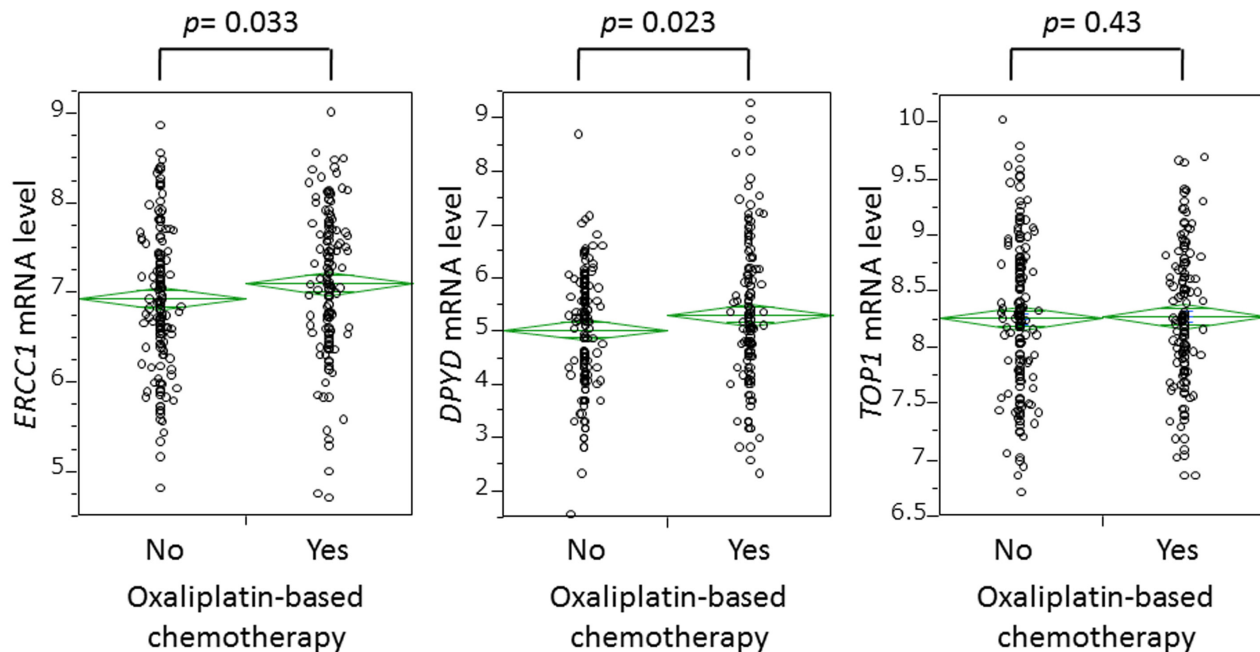

Figure 2: Comparison of expression levels of *ERCC1*, *DPYD*, and *TOP1* genes in tumor cells with and without oxaliplatin-based chemotherapy before hepatectomy.

of ERCC1 protein, especially in the nucleus, whereas both tumor and stromal cells expressed DPD protein (Supplemental figure 1). One of the investigators, blinded to all other participant data, classified nuclear ERCC1 and DPD expression as absent, weak, moderate, or strong. Tumors with weak to strong expression were defined as “positive,” and tumors not expressing these proteins were defined as “negative.” Among 340 colorectal liver metastases, 181 (55%) and 131 (39%) tumors tested positive for ERCC1 and DPD, respectively. Importantly, ERCC1 and DPD positivity was significantly associated with mRNA expression levels for each gene ( $P=0.0042$  for DPD,  $P<0.001$  for ERCC1). Positive DPD was significantly associated with prior oxaliplatin-based chemotherapy ( $p = 0.027$ ; see Supplemental Table 2), consistent with the RT-PCR results. Conversely, ERCC1 expression was unrelated to prior oxaliplatin-based chemotherapy ( $p = 0.44$ ; Supplemental Table 2).

### VEGFA expression level and bevacizumab

To test the effect of bevacizumab on *VEGFA* mRNA expression, we evaluated the mRNA expression level of *VEGFA* in the presence and absence of bevacizumab therapy. In this study, 63 patients had received a prior

bevacizumab-including regimen, while 277 patients had not received this therapy. Among the non-bevacizumab group, 172 and 105 patients had received a prior oxaliplatin-including regimen and no chemotherapy, respectively. Results of tumoral *VEGFA* mRNA were available in 301 patients. Importantly, *VEGFA* mRNA expression level was higher in patients receiving bevacizumab ( $n = 51$ ; mean = 3.18, median = 3.12) than in their non-bevacizumab counterparts ( $n = 251$ ; mean = 2.81, median = 2.89) ( $p = 0.007$ ) (Figure 4A). Additionally, we found that whereas *VEGFA* mRNA expression levels were unaffected by oxaliplatin-based chemotherapy, they were significantly altered by bevacizumab ( $P = 0.014$ ) (Figure 4B). The bevacizumab-including regimen did not influence the expression levels of *ERCC1*, *DPYD*, or *TOP1* ( $P > 0.10$ ).

### DISCUSSION

Our multicenter study of 346 CRC patients revealed significantly higher *ERCC1* and *DPYD* expression in patients receiving oxaliplatin as a first-line chemotherapy than in patients receiving no chemotherapy. Given that IRIS (irinotecan/S-1) regimens based on the DPD inhibitor fluoropyrimidine may be more effective against DPD-

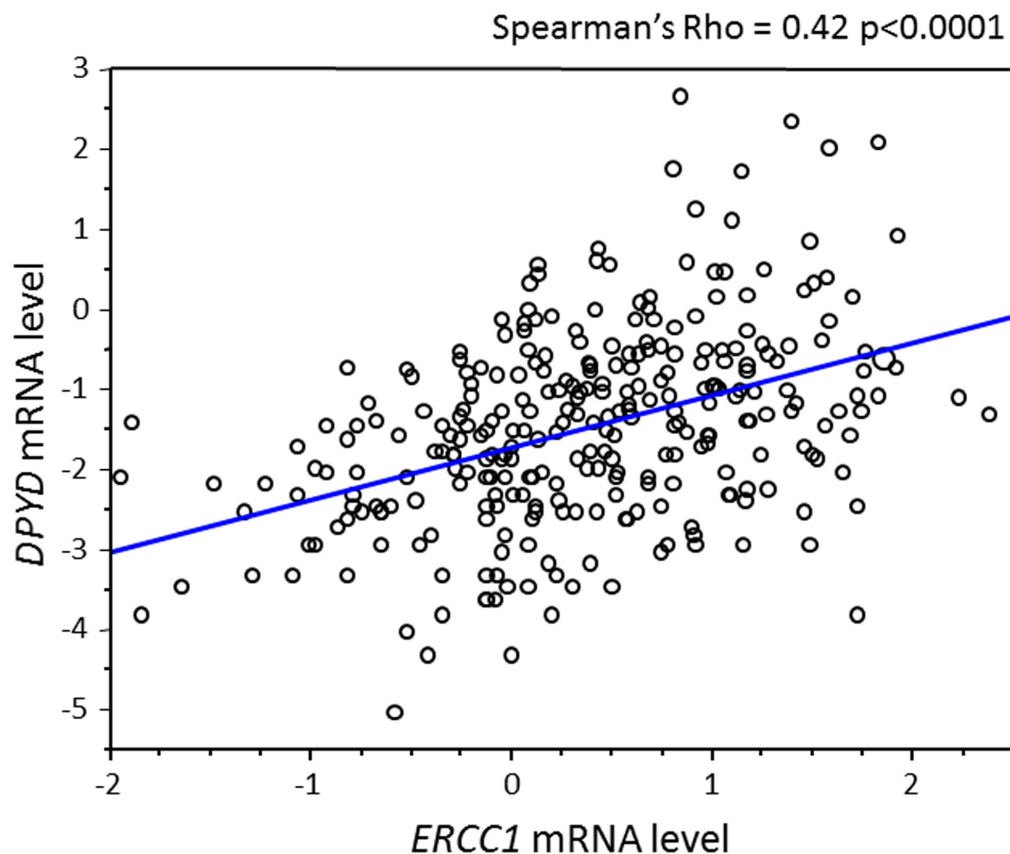

Figure 3: Relationship between *ERCC1* and *DPYD* expression levels.



high tumors than FOLFIRI, this finding is consistent with a recent clinical study, which suggested that patients previously treated with oxaliplatin-based chemotherapy better responded to IRIS than to FOLFIRI.[9, 10] Second, we found that administering bevacizumab to patients raised their *VEGFA* expression levels, supporting that bevacizumab encourages *VEGFA* mRNA expression from tumor cells via feedback or alternative unknown mechanisms. This phenomenon provides a possible biologic rationale for continuing bevacizumab after first progression.

Molecular responses to chemotherapy and molecular-targeted therapy have been implicated in acquired resistance to these therapies. Thus, by better understanding these molecular alterations, we may select a more effectual second-line regimen. To our knowledge, we present the first demonstration of a basic rationale for second-line therapy following failure of oxaliplatin-based first-line therapy in CRC patients. Additionally, we hypothesized the biologic rationale for continuing bevacizumab treatment after first progression. In this context, the clinical implications of our study could be considerable.

Although a previous analysis found that IRIS was superior to FOLFIRI in patients previously treated with oxaliplatin-based chemotherapy,[9] the molecular mechanisms underlying this finding were not clarified. In our previous *in-silico* study of cell-line panel data retrieved from the National Cancer Institute 60 (NCI60), oxaliplatin and 5-FU sensitivities were significantly correlated, and

cells resistant to oxaliplatin showed significantly higher ERCC1 and DPD expression than sensitive cells.[11] Clinical samples also confirmed that the cancer cells of FOLFOX-treated patients expressed significantly more ERCC1 and DPD than cells of non-treated patients. Based on these findings, we propose the following hypothesis (Figure 5A). Following first-line oxaliplatin-based treatment, oxaliplatin-sensitive tumor cells (with low ERCC1 levels; colored gray in Figure 5A) are killed, whereas a small fraction of relatively oxaliplatin-resistant cells (with high ERCC1 levels; colored red in Figure 5A) survive. The NCI60 cell-line data reveal *ERCC1* and *DPYD* gene expressions as confounding factors; therefore, surviving cells will express high levels of both *ERCC1* and *DPYD*. As the IRIS regimen contains the DPD inhibitory fluoropyrimidine S-1,[20] it will more effectively target DPD-high tumors than FOLFIRI (based on fluoropyrimidine, which does not inhibit DPD). This hypothesis was supported in the current study of more than 300 CRC samples retrieved from multiple centers. Of course, these findings must be consolidated by further studies. We also need to elucidate the molecular mechanisms underlying the confounding effects of *ERCC1* and *DPYD* gene expression in cancer cells.

Continuing VEGF inhibition by bevacizumab treatment beyond disease progression is widely accepted as beneficial for patients with metastatic CRC. [14-18] According to the “normalization” hypothesis, bevacizumab instigates a redistribution of tumor blood flow, increasing the delivery of chemotherapy to the tumor.

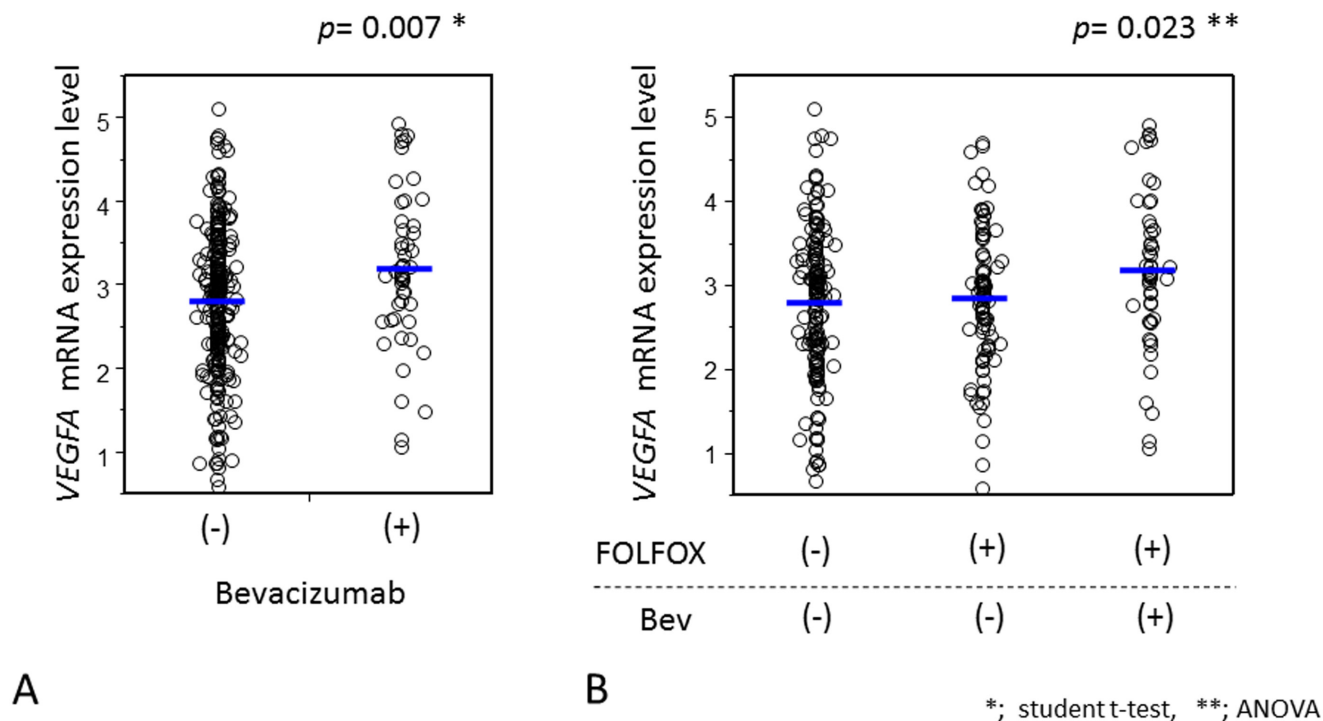

Figure 4: Comparison of *VEGFA* expression levels in tumor cells with and without bevacizumab treatment before hepatectomy.

[21, 22] Another possible mechanism is treatment-related changes in VEGFA, although attempts to predict the effect of bevacizumab on tumor or plasma VEGFA levels have been largely inconsistent. Several clinical studies have demonstrated that bevacizumab delivery elevates levels of circulating VEGFA.[19, 23, 24] Nonetheless, to our knowledge, the effect of bevacizumab on tumoral VEGFA levels has not been previously reported. CRC cells exposed to bevacizumab increase their *VEGFA* gene expression, with consequent increases in tumor cell migration and

invasion, and metastatic potential *in vivo*. [25] Collectively, our findings suggest that bevacizumab encourages *VEGFA* mRNA expression in tumor cells via an unknown feedback mechanism. Therefore, bevacizumab is a clinical necessity even after first progression (Figure 5B).

There are advantages in accessing the databases of multiple centers. The importance of large-scale studies cannot be overemphasized, because small studies yielding significant results are much more likely to be published than those yielding null results, leading to publication

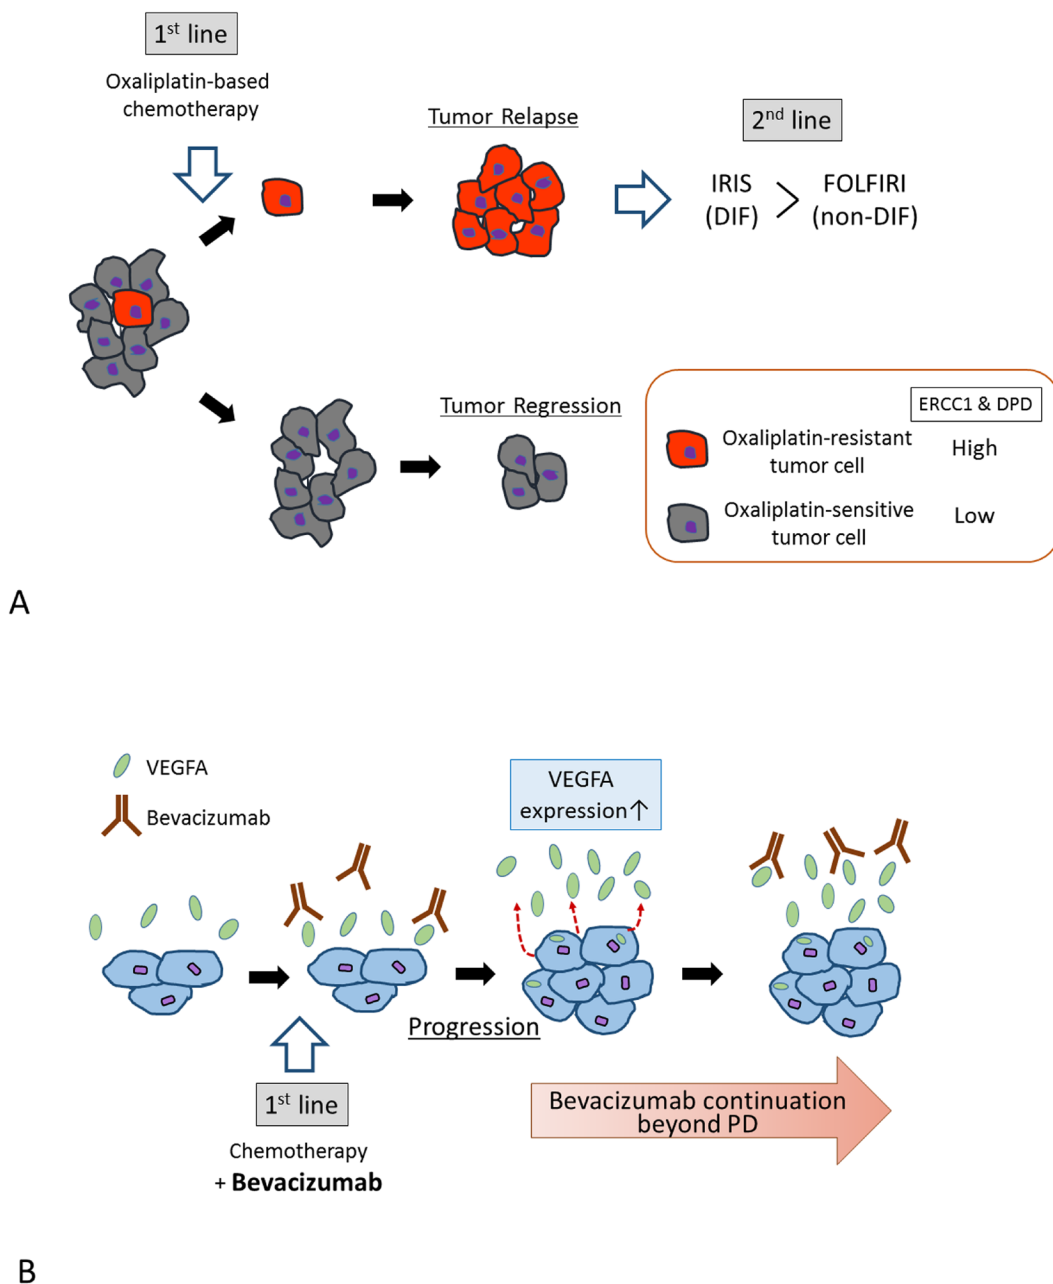

**Figure 5: A.** Proposed molecular mechanism underlying the superiority of IRIS treatment in prior oxaliplatin-treated patients. Oxaliplatin-resistant tumor cells may be sensitized to IRIS therapy by their high ERCC1 and DPD levels. **B.** Proposed molecular mechanism rationalizing continued bevacizumab treatment after first progression. Bevacizumab may encourage *VEGFA* mRNA expression from tumor cells via an unknown feedback mechanism.

bias. The 346 participants in the present study were treated at 22 hospitals throughout Japan. Thus, this sample better represents the Japanese CRC population than samples collected from a few academic hospitals. The limitations of a multiple database study are that resected specimen-handling procedures (such as taking samples and preparing formalin-fixed paraffin-embedded tissues) subtly differ among medical centers. This may explain our unexpected result that ERCC1 immunostaining is independent of prior oxaliplatin-based chemotherapy. Another limitation may be the lack of tumor specimens which are obtained before chemotherapeutic treatment. The current retrospective study could not examine the relationship between pre-treatment status of ERCC1 and DPYD expression and therapeutic response. In addition, we could not set the cut-offs for these molecular markers toward the future practical application in the clinical setting. We acknowledge that a well-planned prospective study is necessary to overcome these limitations.

In summary, this multicenter study revealed that ERCC1 and DPYD expression levels are increased by first-line oxaliplatin-based chemotherapy, with possible impacts on chemosensitivity to subsequent therapy. Second, we found that bevacizumab administration boosts VEGFA expression levels in the tumors of receiving patients, providing a possible biologic rationale for continuing bevacizumab treatment after first progression.

## MATERIALS AND METHODS

### Study subjects

This retrospective study included 346 CRC patients who underwent hepatectomy for liver metastasis between April 2005 and October 2013 at 22 institutions in Japan. All tumors were histologically diagnosed as adenocarcinomas of the colon or rectum. As the aim of this study was to compare the expression levels of ERCC1, DPYD and VEGFA between patients receiving oxaliplatin-based chemotherapy and patients receiving no chemotherapy, we enrolled both types of patients equally. As a result, 171 patients had undergone no chemotherapy prior to hepatectomy, and 175 patients had received oxaliplatin-based chemotherapy [5-fluorouracil, leucovorin, and oxaliplatin (FOLFOX) (92 cases), FOLFOX + Bevacizumab (58 cases), capecitabine and oxaliplatin (XELOX) (5 cases), XELOX + Bevacizumab (5 cases), other treatments (15 cases)] prior to hepatectomy. On average, the chemotherapy group had received 8 courses (cycles) of treatment (range 2–34 courses). We initially subjected 346 cancer specimens to molecular analyses (i.e., immunohistochemical staining and quantitative reverse transcription polymerase chain reaction (RT-PCR), and retrieved valid results from 336

(97%) of the specimens. Thus, 336 colorectal tumors (166 from the oxaliplatin-based chemotherapy group and 170 from the no-chemotherapy group) were finally included in this study (Figure 1). The study protocol was approved by the independent ethics committee of each participating institution.

### Quantitative RT-PCR

The protocols of RNA isolation and cDNA synthesis are shown in Supplemental data 1. Gene expression levels of ERCC1, DPYD, topoisomerase-1 (TOP1) and VEGFA were determined by TaqMan real-time PCR (Life Technologies, Foster City, CA) as previously described. [26, 27] The endogenous reference gene was  $\beta$ -Actin (ACTB). All genes from all samples were run in triplicate. The smallest detectable quantity of amplified cDNA defines the cycle threshold (Ct) value, which is inversely proportional to the cDNA content. Universal Mix RNAs (Stratagene, La Jolla, CA) were used as control calibrators on each plate. The primer sequences for ERCC1, DPYD, TOP1, VEGFA and ACTB were as previously described. [27, 28] The adopted primers and probes are listed in Supplemental Table 1.

The PCR reaction mixture comprised 1,200 nmol/L of each primer, 200 nmol/L probe, 0.4 units of AmpliTaq Gold Polymerase, 200 nmol/L each of dATP, dCTP, dGTP, dTTP, 3.5 mmol/L MgCl<sub>2</sub>, and 1× Taqman buffer A containing a reference dye. Reagents (all purchased from Life technologies, Foster City, CA) were combined in a final volume of 20  $\mu$ L. Cycling conditions were 50°C for 2 minutes and 95°C for 10 minutes, followed by 46 15-second cycles at 95°C and 60°C for 1 minute. The threshold cycle (Ct) was the fractional cycle number at which the fluorescence generated by the probe cleavage exceeded a fixed level above baseline. The relative amount of tissue target mRNA, standardized against the amount of ACTB mRNA, was expressed as  $-\Delta Ct = - (Ct(\text{target gene}) - Ct(\beta\text{-actin}))$ . The number ratio of target mRNA copies to ACTB mRNA copies was then calculated as  $2^{-\Delta Ct} \times K$ , where K is a constant. [29] To prevent significant contamination by genomic DNA, we amplified non-reverse-transcribed RNA only.

### Immunohistochemical staining

In preparation for ERCC1 and DPD analyses, the slides were incubated overnight at 4°C with primary anti-ERCC1 monoclonal antibody (Clone D-10; Santa Cruz Biotechnology, Inc., Santa Cruz, CA) and primary anti-DPD monoclonal antibody (Clone OF-303, Taiho Pharmaceutical Co., Ltd, Tokyo, Japan), respectively. Both antibodies were diluted by a factor of 100. The secondary antibody was a ready-to-use anti-mouse EnVision-Peroxidase system (Dako Japan Inc., Tokyo, Japan).



The remaining procedure was performed using a Dako EnVision+ System (Dako Japan Inc). The chromogenic detection substrate was DAB (3,30-diaminobenzidine). The stained slides were counterstained with hematoxylin and bluing reagent.

## Statistical methods

Categorical data were analyzed by the w2 test. Inter-group differences were evaluated by Student's t-test or the Wilcoxon test. Results were considered statistically significant at the  $P < 0.05$  level. All statistical analyses were performed by JMP version 8.01 software (SAS Institute Inc., Cary, NC).

## ACKNOWLEDGEMENTS

Our study was supported by unrestricted technical assistance from Taiho Pharmaceutical Co., Ltd, Japan. We thank Kazuto Harada, Keisuke Kosumi, and Keisuke Miyake for their technical support. We also thank Takashi Kobunai for his helpful advice.

## CONFLICTS OF INTEREST

No conflict of interest exists.

## REFERENCES

1. O'Neil BH and Goldberg RM. Innovations in chemotherapy for metastatic colorectal cancer: an update of recent clinical trials. *The oncologist*. 2008; 13:1074-1083.
2. Benson AB, 3rd, Venook AP, Bekaii-Saab T, Chan E, Chen YJ, Cooper HS, Engstrom PF, Enzinger PC, Fenton MJ, Fuchs CS, Grem JL, Hunt S, Kamel A, Leong LA, Lin E, Messersmith W, et al. Colon cancer, version 3.2014. *Journal of the National Comprehensive Cancer Network : JNCCN*. 2014; 12:1028-1059.
3. Schmoll HJ, Van Cutsem E, Stein A, Valentini V, Glimelius B, Haustermans K, Nordlinger B, van de Velde CJ, Balmana J, Regula J, Nagtegaal ID, Beets-Tan RG, Arnold D, Ciardiello F, Hoff P, Kerr D, et al. ESMO Consensus Guidelines for management of patients with colon and rectal cancer. a personalized approach to clinical decision making. *Annals of oncology : official journal of the European Society for Medical Oncology / ESMO*. 2012; 23:2479-2516.
4. Bendell JC, Nemunaitis J, Vukelja SJ, Hagenstad C, Campos LT, Hermann RC, Sportelli P, Gardner L and Richards DA. Randomized placebo-controlled phase II trial of perifosine plus capecitabine as second- or third-line therapy in patients with metastatic colorectal cancer. *Journal of clinical oncology : official journal of the American Society of Clinical Oncology*. 2011; 29:4394-4400.
5. Peeters M, Price TJ, Cervantes A, Sobrero AF, Ducreux M, Hotko Y, Andre T, Chan E, Lordick F, Punt CJ, Strickland AH, Wilson G, Ciuleanu TE, Roman L, Van Cutsem E, Tzekova V, et al. Randomized phase III study of panitumumab with fluorouracil, leucovorin, and irinotecan (FOLFIRI) compared with FOLFIRI alone as second-line treatment in patients with metastatic colorectal cancer. *Journal of clinical oncology : official journal of the American Society of Clinical Oncology*. 2010; 28:4706-4713.
6. Peeters M, Price TJ, Cervantes A, Sobrero AF, Ducreux M, Hotko Y, Andre T, Chan E, Lordick F, Punt CJ, Strickland AH, Wilson G, Ciuleanu TE, Roman L, Van Cutsem E, Tian Y, et al. Final results from a randomized phase 3 study of FOLFIRI +/- panitumumab for second-line treatment of metastatic colorectal cancer. *Annals of oncology : official journal of the European Society for Medical Oncology / ESMO*. 2014; 25:107-116.
7. Grothey A, Van Cutsem E, Sobrero A, Siena S, Falcone A, Ychou M, Humblet Y, Bouche O, Mineur L, Barone C, Adenis A, Tabernero J, Yoshino T, Lenz HJ, Goldberg RM, Sargent DJ, et al. Regorafenib monotherapy for previously treated metastatic colorectal cancer (CORRECT): an international, multicentre, randomised, placebo-controlled, phase 3 trial. *Lancet*. 2013; 381:303-312.
8. Yoshino T, Mizunuma N, Yamazaki K, Nishina T, Komatsu Y, Baba H, Tsuji A, Yamaguchi K, Muro K, Sugimoto N, Tsuji Y, Moriwaki T, Esaki T, Hamada C, Tanase T and Ohtsu A. TAS-102 monotherapy for pretreated metastatic colorectal cancer: a double-blind, randomised, placebo-controlled phase 2 trial. *The lancet oncology*. 2012; 13:993-1001.
9. Muro K, Boku N, Shimada Y, Tsuji A, Sameshima S, Baba H, Satoh T, Denda T, Ina K, Nishina T, Yamaguchi K, Takiuchi H, Esaki T, Tokunaga S, Kuwano H, Komatsu Y, et al. Irinotecan plus S-1 (IRIS) versus fluorouracil and folinic acid plus irinotecan (FOLFIRI) as second-line chemotherapy for metastatic colorectal cancer: a randomised phase 2/3 non-inferiority study (FIRIS study). *The lancet oncology*. 2010; 11:853-860.
10. Yasui H, Muro K, Shimada Y, Tsuji A, Sameshima S, Baba H, Satoh T, Denda T, Ina K, Nishina T, Yamaguchi K, Esaki T, Tokunaga S, Kuwano H, Boku N, Komatsu Y, et al. A phase 3 non-inferiority study of 5-FU/l-leucovorin/irinotecan (FOLFIRI) versus irinotecan/S-1 (IRIS) as second-line chemotherapy for metastatic colorectal cancer: updated results of the FIRIS study. *Journal of cancer research and clinical oncology*. 2015; 41: 153-60.
11. Baba H, Watanabe M, Okabe H, Miyamoto Y, Sakamoto Y, Baba Y, Iwatsuki M, Chikamoto A and Beppu T. Upregulation of ERCC1 and DPYD expressions after oxaliplatin-based first-line chemotherapy for metastatic colorectal cancer. *British journal of cancer*. 2012; 107:1950-1955.
12. Harris M. Monoclonal antibodies as therapeutic agents for

cancer. *The lancet oncology*. 2004; 5:292-302.

13. Hicklin DJ and Ellis LM. Role of the vascular endothelial growth factor pathway in tumor growth and angiogenesis. *Journal of clinical oncology : official journal of the American Society of Clinical Oncology*. 2005; 23:1011-1027.
14. Kubicka S, Greil R, Andre T, Bennouna J, Sastre J, Van Cutsem E, von Moos R, Osterlund P, Reyes-Rivera I, Muller T, Makrutzki M, Arnold D, ML18147 study investigators including Aio GFUGTGB and groups A. Bevacizumab plus chemotherapy continued beyond first progression in patients with metastatic colorectal cancer previously treated with bevacizumab plus chemotherapy: ML18147 study KRAS subgroup findings. *Annals of oncology : official journal of the European Society for Medical Oncology / ESMO*. 2013; 24:2342-2349.
15. Bennouna J, Sastre J, Arnold D, Osterlund P, Greil R, Van Cutsem E, von Moos R, Vieitez JM, Bouche O, Borg C, Steffens CC, Alonso-Orduna V, Schlichting C, Reyes-Rivera I, Bendahmane B, Andre T, et al. Continuation of bevacizumab after first progression in metastatic colorectal cancer (ML18147): a randomised phase 3 trial. *The lancet oncology*. 2013; 14:29-37.
16. Grothey A. VEGF inhibition beyond tumour progression. *The lancet oncology*. 2013; 14(1):2-3.
17. Giantonio BJ. Targeted therapies: Goldie-Coldman and bevacizumab beyond disease progression. *Nature reviews Clinical oncology*. 2009; 6:311-312.
18. Grothey A, Sugrue MM, Purdie DM, Dong W, Sargent D, Hedrick E and Kozloff M. Bevacizumab beyond first progression is associated with prolonged overall survival in metastatic colorectal cancer: results from a large observational cohort study (BRiTE). *Journal of clinical oncology : official journal of the American Society of Clinical Oncology*. 2008; 26:5326-5334.
19. Lambrechts D, Lenz HJ, de Haas S, Carmeliet P and Scherer SJ. Markers of response for the antiangiogenic agent bevacizumab. *Journal of clinical oncology : official journal of the American Society of Clinical Oncology*. 2013; 31:1219-1230.
20. Eng C, Kindler HL and Schilsky RL. Oral fluoropyrimidine treatment of colorectal cancer. *Clinical colorectal cancer*. 2001; 1:95-103.
21. Tong RT, Boucher Y, Kozin SV, Winkler F, Hicklin DJ and Jain RK. Vascular normalization by vascular endothelial growth factor receptor 2 blockade induces a pressure gradient across the vasculature and improves drug penetration in tumors. *Cancer research*. 2004; 64:3731-3736.
22. Jain RK. Normalization of tumor vasculature: an emerging concept in antiangiogenic therapy. *Science*. 2005; 307:58-62.
23. Willett CG, Duda DG, di Tomaso E, Boucher Y, Ancukiewicz M, Sahani DV, Lahdenranta J, Chung DC, Fischman AJ, Lauwers GY, Shellito P, Czito BG, Wong TZ, Paulson E, Poleski M, Vujaskovic Z, et al. Efficacy, safety, and biomarkers of neoadjuvant bevacizumab, radiation therapy, and fluorouracil in rectal cancer: a multidisciplinary phase II study. *Journal of clinical oncology : official journal of the American Society of Clinical Oncology*. 2009; 27:3020-3026.
24. Baar J, Silverman P, Lyons J, Fu P, Abdul-Karim F, Ziats N, Wasman J, Hartman P, Jesberger J, Dumadag L, Hohler E, Leeming R, Shenk R, Chen H, McCrae K, Dowlati A, et al. A vasculature-targeting regimen of preoperative docetaxel with or without bevacizumab for locally advanced breast cancer: impact on angiogenic biomarkers. *Clinical cancer research : an official journal of the American Association for Cancer Research*. 2009; 15:3583-3590.
25. Fan F, Samuel S, Gaur P, Lu J, Dallas NA, Xia L, Bose D, Ramachandran V and Ellis LM. Chronic exposure of colorectal cancer cells to bevacizumab promotes compensatory pathways that mediate tumour cell migration. *British journal of cancer*. 2011; 104:1270-1277.
26. Heid CA, Stevens J, Livak KJ and Williams PM. Real time quantitative PCR. *Genome research*. 1996; 6(10):986-994.
27. Kuramochi H, Hayashi K, Uchida K, Miyakura S, Shimizu D, Vallbohmer D, Park S, Danenberg KD, Takasaki K and Danenberg PV. Vascular endothelial growth factor messenger RNA expression level is preserved in liver metastases compared with corresponding primary colorectal cancer. *Clinical cancer research : an official journal of the American Association for Cancer Research*. 2006; 12:29-33.
28. Schneider S, Uchida K, Brabender J, Baldus SE, Yochim J, Danenberg KD, Salonga D, Chen P, Tsao-Wei D, Groshen S, Hoelscher AH, Schneider PM and Danenberg PV. Downregulation of TS, DPYD, ERCC1, GST-Pi, EGFR, and HER2 gene expression after neoadjuvant three-modality treatment in patients with esophageal cancer. *Journal of the American College of Surgeons*. 2005; 200:336-344.
29. Livak KJ and Schmittgen TD. Analysis of relative gene expression data using real-time quantitative PCR and the 2(-Delta Delta C(T)) Method. *Methods*. 2001; 25:402-408.
